# Supplementary material for: Sensitivity Analysis of Vagus Nerve Stimulation Parameters on Acute Cardiac Autonomic Responses: Chronotropic, Inotropic and Dromotropic Effects
Source: PubMed Central journal article supplement (PMC5045213; doi:10.1371/journal.pone.0163734), 2016-09-30
Supplement: pone.0163734.s005.pdf [file pone.0163734.s005.pdf]

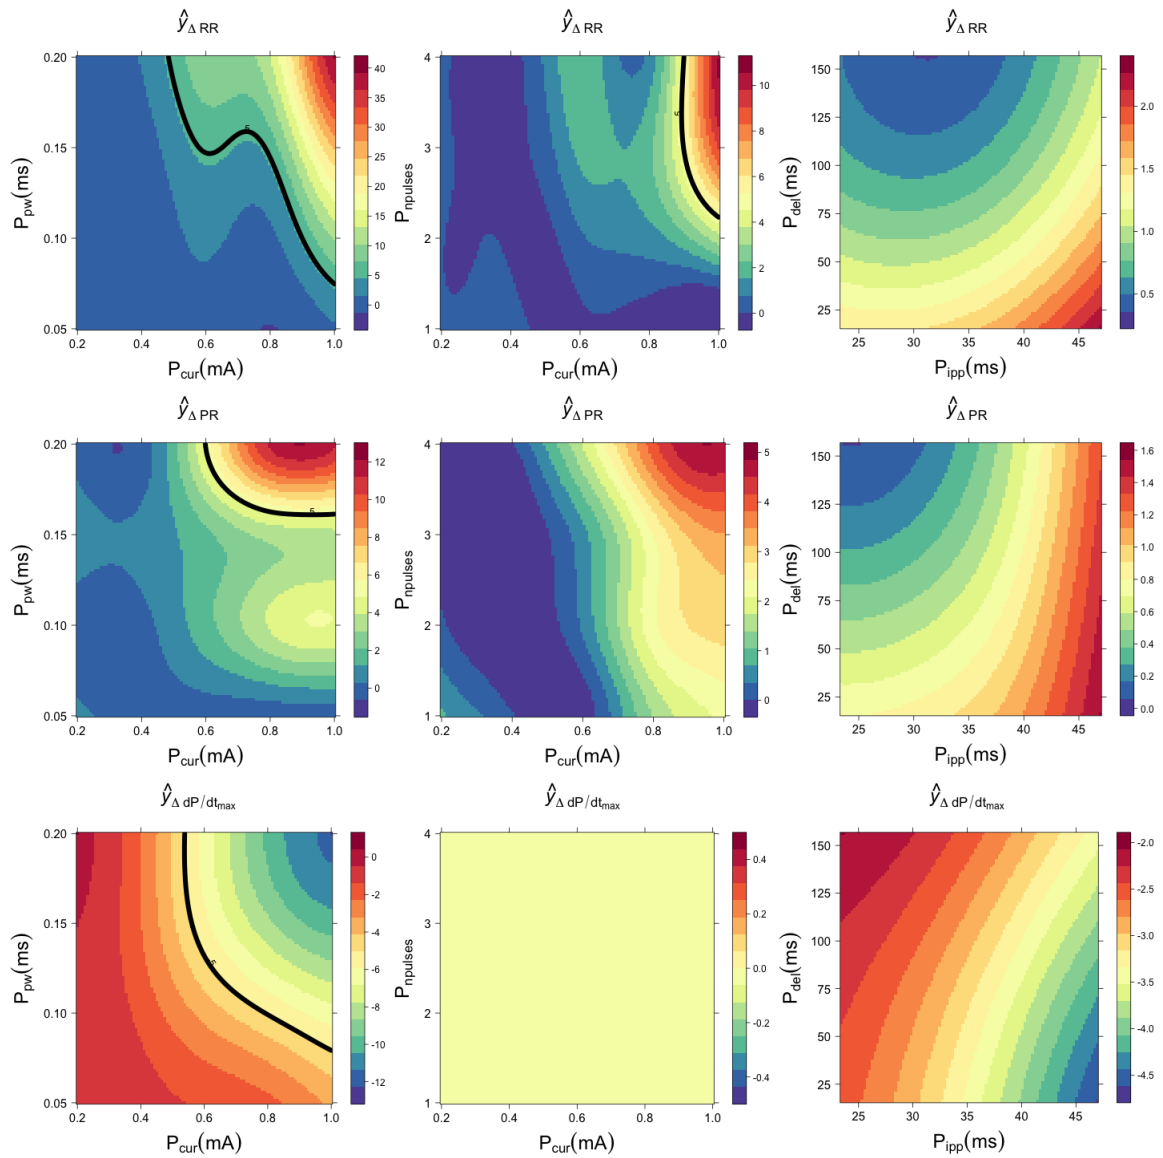

S5 Fig. Example surface responses of the chronotropic, dromotropic and inotropic effects to VNS (respectively the first, second and third rows), generated with a Gaussian process regression for sheep 6
